# Supplementary material for: Interlayer spacing in pillared and grafted MCM-22 type silicas: density functional theory analysis versus experiment
Source: Royal Society of Chemistry journal article supplement (doi:10.1039/d2cp03391g), 2022-10-17
Supplement: d2cp03391g1.pdf [file d2cp03391g1.pdf]

## Electronic Supplementary Information (ESI) for **Interlayer spacing in pillared and grafted MCM-22 type silicas: Density functional theory analysis versus experiment**

Yong Han,<sup>\*a,b</sup> Puranjan Chatterjee,<sup>a,c</sup> Sardar B. Alam,<sup>a</sup> Tanya Prozorov,<sup>a</sup> Igor I. Slowing<sup>a,c</sup> and James W. Evans<sup>a,b</sup>

<sup>a</sup> *Division of Chemical and Biological Sciences, Ames National Laboratory, Ames, Iowa 50011, USA*

<sup>b</sup> *Department of Physics and Astronomy, Iowa State University, Ames, Iowa 50011, USA*

<sup>c</sup> *Department of Chemistry, Iowa State University, Ames, Iowa 50011, USA*

\*Corresponding author email: [y27h@ameslab.gov](mailto:y27h@ameslab.gov)

### **Contents**

**ESI1. Effect of Al content on interlayer spacing in MCM-22 materials**

**ESI2. Effect of pillaring agent on interlayer spacing in MCM-22 materials**

**ESI3. DFT benchmark analysis for bulk property of  $\alpha$ -quartz**

**ESI4. DFT benchmark analysis for the geometric structures of trimethylsilanol and propane**

**ESI5. DFT benchmark analysis for bulk property of MCM-22 with Si:Al = 1:0**

**ESI6. Synthesis and XRD and FTIR analysis of pillared MCM-22**

**ESI7. Analysis of interlayer spacings in MCM-22 and AP-MCM-22 from STEM**

**ESI8. MD simulation parameters with empirical ReaxFF**

**ESI9. Characterization of different classes of H-bonding**

**ESI10. Atomic spacings between H atoms and their surrounding atoms**

**ESI11. Relative thermodynamic stability of pillared versus grafted configurations**

### ESI1. Effect of Al content on interlayer spacing in MCM-22 materials

Here, we assess the dependence of interlayer spacing in MCM-22 materials on the Al content specifically by examining and comparing materials for Si:Al = 51:1, 42:1, and 20:1. The goal of this analysis is to provide support for our claim that there should be no significant difference between this spacing for materials with Si:Al = 51:1 and for pure silica MCM-22. This analysis utilizes x-ray diffraction (XRD), as described in Section 2.2 for the analysis of MCM-22P, MCM-22 with Si:Al = 51:1, and MCM-22 with Si:Al = 51:1 after exposure to pillaring agent. The Si:Al = 51:1 ratio implies only slightly more than one substituted Al per unit cell of pure silica version of MCM-22 (which has 72 Si). Even with a potential preference for Al to substitute a Si at the surface of MCM-22 layers [26], we suggested that such substitution should have negligible effect on interlayer spacing.

This hypothesis is supported by the fact that the reported interlayer  $d$ -spacing in ITQ-1 (pure silica analogue of MCM-22) is ca. 25 Å [22] which is similar to the  $d$ -spacing of our MCM-22. To assess the Al amount needed in the material to obtain noticeable changes in the  $d$ -spacing, we prepared two more MCM-22 materials with Si:Al ratios of 42:1 and 20:1, which correspond to ca. 1.7 and 3.4 Al atoms per unit cell, respectively. Prior to calcination, both materials showed similar  $d$ -spacing (ca. 27 Å) as in that of our original material (with Si:Al = 51:1). While the material with Si:Al = 42:1 ratio, i.e., 42:1 MCM-22, showed similar  $d$ -spacing (ca. 25.4 Å) to that of 51:1 MCM-22 (ca. 25.3 Å), the 20:1 MCM-22 exhibited a significantly larger  $d$ -spacing of ca. 26.5 Å. See Fig. S1. Therefore, we can conclude that only MCM-22 materials with Si:Al ratio below about 40:1 show noticeably different interlayer spacing than pure silica MCM-22.

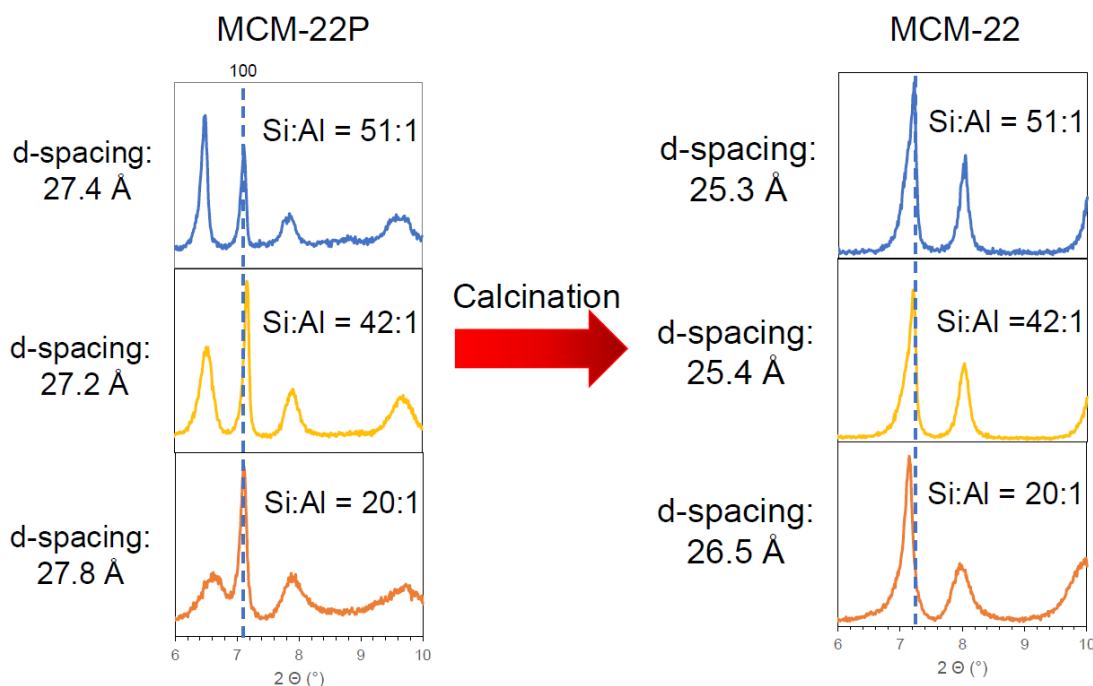

**Fig. S1.** Powder XRD data for MCM-22P and for MCM-22 with three different Al contents.

## ESI2. Effect of pillaring agent on interlayer spacing in MCM-22 materials

Here, we assess the dependence of interlayer spacing in pillared MCM-22 materials on the molecular composition of the pillaring agent, and specifically on the length of the hydrocarbon chain. We suggested that the chain should lie roughly parallel to the layers in MCM-22, and thus its length should not have a significant impact on interlayer spacing. We utilize the DFT methodology described in Section 2.1, and follow the procedure described in Section 3.2 for studies of partial pillaring of MCM-22 with 50%  $-OH$  + 50%  $(-O_2)SiOHCH_3$  (i.e., half of the  $-OH$  pairs on adjacent surfaces in an interlayer space are replaced by pillars of the form  $(-O_2)SiOHCH_3$  where the  $-O_2$  in this unit come from the two O in an  $-OH$  pair). Now instead we perform an analysis where the  $(-O_2)SiOHCH_3$  pillar is replaced by  $(-O_2)SiOHCH_2CH_3$ . Results are shown in **Fig. S2** for the variation of system energy with interlayer spacing for partially pillared MCM-22 comparing results for  $(-O_2)SiOHCH_2CH_3$  and  $(-O_2)SiOHCH_3$  pillars. From the minima in these curves, it follows that the difference in interlayer spacing for these two types of pillars is only 0.2 Å. This result supports the above claim.

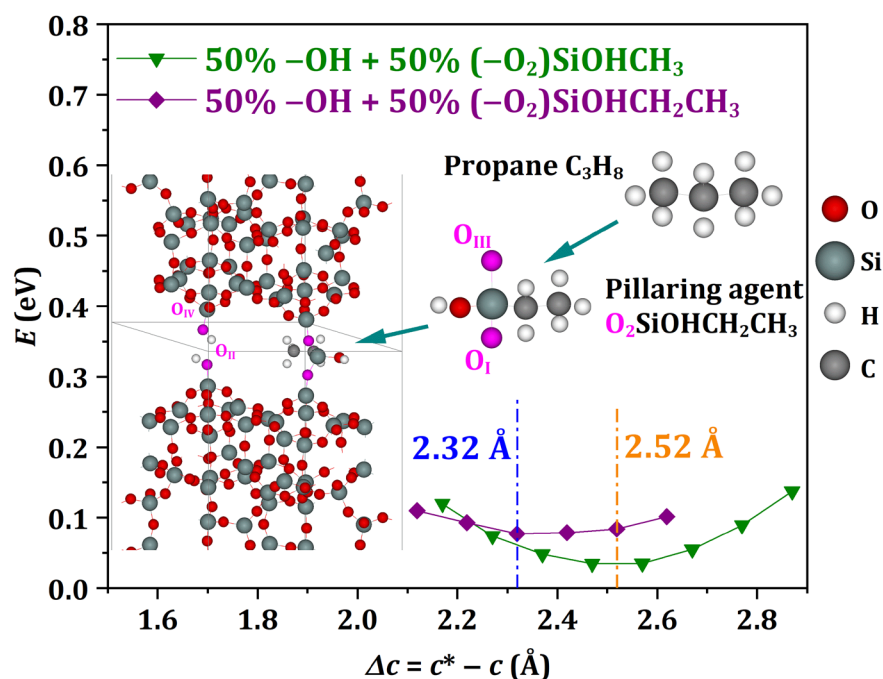

**Fig. S2.** System energy versus interlayer spacing for partially pillared MCM-22 comparing results for  $(-O_2)SiOHCH_2CH_3$  pillars (purple curve) and  $(-O_2)SiOHCH_3$  pillars (green curve, the same as the green curve in **Fig. 3b**).

For the above analysis with  $(-O_2)SiOHCH_2CH_3$  pillars, the initial geometry of the chain in the DFT calculation was selected guided by the geometry of propane (but replacing one C by Si, etc., as indicated by the insets in **Fig. S2**). Of course, the initial orientation of the geometry is not critical (as discussed for **Fig. 3b**), and relaxation of atomic coordinates is

performed before reporting system energies. However, it is instructive to assess how well the DFT functional utilized in this analysis recovers the geometry of propane. This is provided in **Section ES14**.

### ESI3. DFT benchmark analysis for bulk property of $\alpha$ -quartz

In order to assess the effectiveness of the optB88-vdW functional for silica systems, we first calculate the bulk properties of a typical silica polymorph,  $\alpha$ -quartz, for which the experimental data of bulk property are available for the purpose of comparison with our DFT results. The  $\alpha$ -quartz crystal has a hexagonal structure, and the unit cell contains three Si atoms and six O atoms (the unit cell formula is denoted as  $\text{Si}_3\text{O}_6$ ), as illustrated in **Fig. S3**. In our DFT calculations for  $\alpha$ -quartz, the supercell is taken to be the unit cell with a  $k$  mesh of  $50 \times 50 \times 50$ . As listed in **Table S1**, the lattice constants  $a$  and  $c$ , the bulk modulus  $B_0$ , the first derivative  $B'_0$  of the bulk modulus with respect to pressure, and the formation enthalpy  $\Delta H_f$  from our optB88-vdW calculations are in excellent agreements with experimental values. As a comparison, we also use the most common PBE GGA functional and the obtained bulk properties are still reasonably good but overall, slightly worse in contrast to the results from the optB88-vdW functional (see **Table S1**).

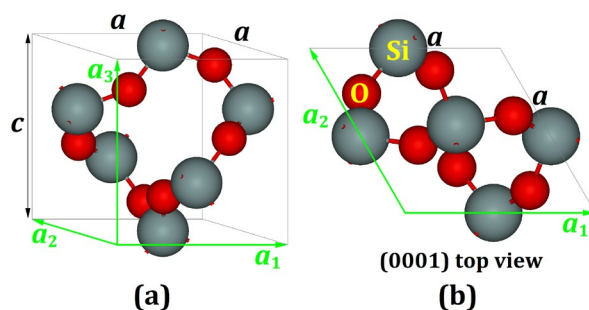

**Fig. S3.** (a) A 3D view and (b) a (0001) top view of  $\alpha$ -quartz. Three primitive vectors  $\mathbf{a}_1$ ,  $\mathbf{a}_2$ , and  $\mathbf{a}_3$  of the hexagonal unit cell ( $\text{Si}_3\text{O}_6$ ) are indicated with  $|\mathbf{a}_1| = |\mathbf{a}_2| = a$ ,  $|\mathbf{a}_3| = c$ ,  $\alpha = \beta = 90^\circ$ , and  $\gamma = 120^\circ$ , where  $\alpha$ ,  $\beta$ , and  $\gamma$  are the angles between  $\mathbf{a}_2$  and  $\mathbf{a}_3$ , between  $\mathbf{a}_1$  and  $\mathbf{a}_3$ , and between  $\mathbf{a}_1$  and  $\mathbf{a}_2$ , respectively.

In the above calculations for lattice constants, we always fully relax the coordinates of all atoms in the unit cell as well as the cell volume and shape for obtaining a configuration with energy  $E_0$  and corresponding volume  $V_0$ . To obtain the elastic properties, we relax the cell shape for a series of configurations with volumes fixed around  $V_0$  to ensure the global energy minimum  $E_0$ . Then, we use the Stacey-Vinet equation of state [49, 50],

$$E = E_0 + \frac{2V_0B_0}{(B'_0 - 1)^2} \left( 2 - \left\{ 5 + 3B'_0 \left[ \left( \frac{V}{V_0} \right)^{\frac{1}{3}} - 1 \right] - 3 \left( \frac{V}{V_0} \right)^{\frac{1}{3}} \right\} e^{\frac{3}{2}(B'_0 - 1) \left[ 1 - \left( \frac{V}{V_0} \right)^{\frac{1}{3}} \right]} \right), \quad (\text{S1})$$

to fit the data points of energy  $E$  versus volume  $V$  so that  $B_0$  and  $B'_0$  are attained. The formation enthalpy  $\Delta H_f$  at 0 K [51] is obtained from

$$\Delta H_f = \frac{E_{(\text{SiO}_2)_n}}{n} - E_{\text{Si}} - E_{\text{O}_2}, \quad (\text{S2})$$

where  $E_{(\text{SiO}_2)_n}$  is the unit cell total energy of a silica polymorph ( $n = 3$  and  $72$  for  $\alpha$ -quartz and ITQ-1, respectively),  $E_{\text{Si}}$  is the energy per Si atom in the bulk Si crystal with diamond structure, and  $E_{\text{O}_2}$  is the energy of a molecule  $\text{O}_2$  in gas phase.

**Table S1.** Bulk property of  $\alpha$ -quartz, predicted from our DFT calculations and compared with available experimental values.  $a$  or  $c$  is the lattice constant.  $B_0$  and  $B'_0$  are obtained from Eq. (S1) for the bulk modulus and the first derivative of the bulk modulus with respect to pressure, respectively. The formation enthalpy  $\Delta H_f$  at 0 K is obtained from Eq. (S2).

| Method          | $a$ (Å)                | $c$ (Å)                | $B_0$ (GPa)         | $B'_0$           | $\Delta H_f$ (eV)   |
|-----------------|------------------------|------------------------|---------------------|------------------|---------------------|
| DFT, PBE GGA    | 5.0409                 | 5.5281                 | 30.82               | 5.1              | -8.431              |
| DFT, optB88-vdW | 4.9168                 | 5.4298                 | 39.98               | 4.5              | -9.004              |
| Experiments     | 4.916(1) <sup>a</sup>  | 5.4054(4) <sup>a</sup> |                     |                  |                     |
|                 | 4.9021(1) <sup>b</sup> | 5.3997(1) <sup>b</sup> |                     |                  |                     |
|                 | 4.914(1) <sup>c</sup>  | 5.406(1) <sup>c</sup>  | 38.979 <sup>d</sup> | 5.8 <sup>d</sup> |                     |
|                 |                        |                        | 37.405 <sup>e</sup> | 6.3 <sup>e</sup> | -9.516 <sup>f</sup> |

<sup>a</sup>At 1 atm [52].

<sup>b</sup>At 13 K [53].

<sup>c</sup>At 1 bar [54].

<sup>d</sup>At -195.8 °C [55].

<sup>e</sup>At 25 °C [55].

<sup>f</sup>At 0 K [56].

#### ESI4. DFT benchmark analysis for the geometric structures of trimethylsilanol and propane

Trimethylsilanol is an organosilicon compound with the chemical formula  $\text{C}_3\text{H}_{10}\text{OSi}$  or  $(\text{CH}_3)_3\text{SiOH}$ . A trimethylsilanol molecule contains one centered Si atom with three methyl groups  $\text{CH}_3$  and one hydroxyl group  $\text{OH}$ . The optimized geometry of one trimethylsilanol molecule in a rectangular supercell of  $24.3 \text{ \AA} \times 24.2 \text{ \AA} \times 24.1 \text{ \AA}$  with a  $k$  mesh of  $1 \times 1 \times 1$  from our optB88-vdW calculation is shown on the left of **Fig. 4a or 5a**. The Cartesian coordinates  $x$ ,  $y$ , and  $z$  of 15 atoms in the molecule are listed in **Table S2** from our PBE and optB88-vdW calculations. From these coordinates, any atomic spacings  $s$  (as used in **Section ESI10**), bond lengths, and bond angles can be readily obtained. In addition, we also obtain the formation enthalpies  $\Delta H_f = -6.130$  and  $-5.271$  eV at 0 K for one trimethylsilanol molecule from our PBE and optB88-vdW calculations, respectively, by using

$$\Delta H_f = E_{\text{C}_3\text{H}_{10}\text{OSi}} - 3E_{\text{C}} - 5E_{\text{H}_2} - \frac{E_{\text{O}_2}}{2} - E_{\text{Si}}, \quad (\text{S3})$$

where  $E_{\text{C}_3\text{H}_{10}\text{OSi}}$  is the total energy of a trimethylsilanol molecule,  $E_{\text{C}}$  is the energy per C atom in bulk graphite,  $E_{\text{Si}}$  is the energy per Si atom in the bulk Si crystal with diamond structure,  $E_{\text{H}_2}$  is the energy of a molecule  $\text{H}_2$  in gas phase, and  $E_{\text{O}_2}$  is the energy of a molecule  $\text{O}_2$  in gas phase.

**Table S2.** The Cartesian coordinates  $x$ ,  $y$ , and  $z$  (in Å) of 15 atoms in an optimized trimethylsilanol molecule from our PBE and optB88-vdW calculations. A number in the first column denotes the ID of an elemental atom.

| Atoms | PBE      |          |          | optB88-vdW |          |          |
|-------|----------|----------|----------|------------|----------|----------|
|       | $x$      | $y$      | $z$      | $x$        | $y$      | $z$      |
| C1    | 11.78260 | 9.85026  | 9.39315  | 11.77890   | 9.85075  | 9.39300  |
| C2    | 8.97876  | 8.55630  | 9.43684  | 8.97964    | 8.55787  | 9.43671  |
| C3    | 9.26504  | 11.63102 | 9.39328  | 9.26651    | 11.62786 | 9.39334  |
| O4    | 9.95386  | 9.93529  | 11.67627 | 9.95820    | 9.93790  | 11.67160 |
| Si5   | 10.00908 | 10.01297 | 10.00164 | 10.00865   | 10.01240 | 9.99936  |
| H6    | 12.23269 | 8.91326  | 9.75203  | 12.22964   | 8.91589  | 9.75187  |
| H7    | 11.82515 | 9.84311  | 8.29340  | 11.82270   | 9.84430  | 8.29493  |
| H8    | 12.41490 | 10.68101 | 9.74070  | 12.40824   | 10.68128 | 9.74168  |
| H9    | 8.94051  | 8.50259  | 8.33909  | 8.94040    | 8.50304  | 8.34040  |
| H10   | 9.39821  | 7.61043  | 9.80786  | 9.39825    | 7.61333  | 9.80758  |
| H11   | 7.94731  | 8.63701  | 9.80813  | 7.94975    | 8.63792  | 9.80798  |
| H12   | 8.23175  | 11.74309 | 9.75257  | 8.23495    | 11.74152 | 9.75224  |
| H13   | 9.83782  | 12.50380 | 9.74095  | 9.84017    | 12.49786 | 9.74180  |
| H14   | 9.24384  | 11.66882 | 8.29357  | 9.24578    | 11.66689 | 8.29524  |
| H15   | 10.43349 | 10.61254 | 12.17582 | 10.43322   | 10.61271 | 12.17758 |

**Table S3.** The Cartesian coordinates  $x$ ,  $y$ , and  $z$  (in Å) of 11 atoms in an optimized propane molecule from our PBE and optB88-vdW calculations. A number in the first column denotes the ID of an elemental atom.

| Atoms | PBE      |          |          | optB88-vdW |          |          |
|-------|----------|----------|----------|------------|----------|----------|
|       | $x$      | $y$      | $z$      | $x$        | $y$      | $z$      |
| C1    | 10.00003 | 9.43225  | 10.00001 | 10.00003   | 9.43135  | 10.00003 |
| C2    | 8.72692  | 10.27917 | 9.99995  | 8.72695    | 10.27998 | 9.99993  |
| C3    | 11.27310 | 10.27928 | 10.00015 | 11.27314   | 10.28007 | 10.00017 |
| H4    | 9.99995  | 8.76842  | 10.87982 | 9.99988    | 8.77029  | 10.87925 |
| H5    | 10.00010 | 8.76858  | 9.12005  | 10.00008   | 8.77050  | 9.12062  |
| H6    | 8.68491  | 10.92961 | 10.88679 | 8.68614    | 10.92826 | 10.88569 |
| H7    | 8.68507  | 10.92961 | 9.11308  | 8.68628    | 10.92815 | 9.11403  |
| H8    | 7.82180  | 9.65541  | 9.99982  | 7.82467    | 9.65600  | 9.99992  |
| H9    | 12.17822 | 9.65554  | 10.00010 | 12.17540   | 9.65611  | 10.00023 |
| H10   | 11.31494 | 10.92975 | 10.88697 | 11.31366   | 10.92838 | 10.88591 |
| H11   | 11.31497 | 10.92968 | 9.11325  | 11.31376   | 10.92821 | 9.11423  |

Propane has the molecular formula  $\text{C}_3\text{H}_8$ , which is a three-carbon alkane. The optimized geometry of one propane molecule in a rectangular supercell of  $24.3 \text{ \AA} \times 24.2 \text{ \AA} \times 24.1 \text{ \AA}$  with a  $k$  mesh of  $1 \times 1 \times 1$  from our optB88-vdW calculation is shown as an inset in **Fig. S2**. The Cartesian coordinates  $x$ ,  $y$ , and  $z$  of the 11 atoms in the molecule are listed in **Table S3** from our PBE and optB88-vdW calculations. From these coordinates, any

atomic spacings  $s$ , bond lengths, and bond angles can be readily obtained. In addition, we also obtain the formation enthalpies  $\Delta H_f = -2.274$  and  $-1.509$  eV at 0 K for one propane molecule from our PBE and optB88-vdW calculations, respectively, by using

$$\Delta H_f = E_{\text{C}_3\text{H}_8} - 3E_{\text{C}} - 4E_{\text{H}_2}, \quad (\text{S4})$$

where  $E_{\text{C}_3\text{H}_8}$  is the total energy of a propane molecule,  $E_{\text{C}}$  is the energy per C atom in bulk graphite, and  $E_{\text{H}_2}$  is the energy of a molecule  $\text{H}_2$  in gas phase.

### ESI5. DFT benchmark analysis for bulk property of MCM-22 with Si:Al = 1:0

In order to assess the effectiveness of the optB88-vdW functional, we assess the bulk property of ITQ-1 (i.e., MCM-22 with Si:Al = 1:0) with a unit cell formula of  $\text{Si}_{72}\text{O}_{144}$  (see Fig. 1a-c). The lattice constants  $a$  and  $c$  from our optB88-vdW calculations are in good agreements with experimental values and better than the results from PBE functional, as listed in Table S4. We also predict  $B_0$ ,  $B'_0$ , and  $\Delta H_f$  from our optB88-vdW and PBE calculations, using Eqs. (S1) and (S2), respectively. The experimental values of  $B_0$ ,  $B'_0$ , and  $\Delta H_f$  are unavailable in literature and therefore the experimental measurements for these quantities are suggested. We also noticed that our PBE calculations predict a negative  $B'_0 = -0.9$ , which might be not reasonable physically, although the fitted  $B'_0$  value is generally not very sensitive to the data points on the energy-volume curve Eq. (S1). In contrast,  $B'_0 = 3.5$  from our optB88-vdW functional is expected to be a reasonable value.

**Table S4.** Bulk property of ITQ-1 (i.e., MCM-22 with Si:Al = 1:0), predicted from our DFT calculations and compared with available experimental values.  $a$  or  $c$  is the lattice constant.  $B_0$  and  $B'_0$  are obtained from Eq. (S1) for the bulk modulus and the first derivative of the bulk modulus with respect to pressure, respectively. The formation enthalpy  $\Delta H_f$  at 0 K is obtained from Eq. (S2). As a comparison, the lattice constants of MCM-22 with composition  $\text{H}_{2.376}\text{Na}_{3.096}(\text{Al}_{0.360}\text{B}_{5.112}\text{Si}_{66.528})\text{O}_{144}$  from early experiments are also listed.

| Crystal                                                                                                                           | Method          | $a$ (Å)                 | $c$ (Å)                  | $B_0$ (GPa) | $B'_0$ | $\Delta H_f$ (eV) |
|-----------------------------------------------------------------------------------------------------------------------------------|-----------------|-------------------------|--------------------------|-------------|--------|-------------------|
| ITQ-1, unit cell formula: $\text{Si}_{72}\text{O}_{144}$                                                                          |                 |                         |                          |             |        |                   |
|                                                                                                                                   | DFT, PBE GGA    | 14.4811                 | 25.3607                  | 62.67       | -0.9   | -8.416            |
|                                                                                                                                   | DFT, optB88-vdW | 14.4542                 | 25.2094                  | 61.56       | 3.5    | -8.839            |
|                                                                                                                                   | Experiments     | 14.2081(1) <sup>a</sup> | 24.945(2) <sup>a</sup>   |             |        |                   |
|                                                                                                                                   |                 | 14.1827(1) <sup>b</sup> | 25.007(3) <sup>b</sup>   |             |        |                   |
| MCM-22, unit cell formula: $\text{H}_{2.376}\text{Na}_{3.096}(\text{Al}_{0.360}\text{B}_{5.112}\text{Si}_{66.528})\text{O}_{144}$ |                 |                         |                          |             |        |                   |
|                                                                                                                                   | Experiment      | 14.1145(8) <sup>c</sup> | 24.8822(18) <sup>c</sup> |             |        |                   |

<sup>a</sup>Ref. [22].

<sup>b</sup>Ref. [57].

<sup>c</sup>Ref. [14].

For the purpose as a  $k$ -point test, in the above bulk calculations for ITQ-1, we intentionally use a larger  $k$  mesh of  $12 \times 12 \times 6$ . To ensure a sufficiently large  $k$  mesh in the calculations with agents, we use the PBE functional obtaining the unit cell total energies 24.75,  $-0.72$ ,  $-0.30$ ,  $-0.15$ ,  $-0.04$ , and 0.04 meV for the  $k$  meshes of  $1 \times 1 \times 1$ ,  $2 \times 2 \times 1$ ,

$4 \times 4 \times 2$ ,  $6 \times 6 \times 3$ ,  $8 \times 8 \times 4$ , and  $10 \times 10 \times 5$ , relative to the energy for the  $k$  mesh of  $12 \times 12 \times 6$ , respectively. This indicates that the  $k$  mesh of  $1 \times 1 \times 1$  is not sufficiently large, while the total energy for the  $k$  mesh of  $2 \times 2 \times 1$  has been well converged and therefore we take the  $k$  mesh of  $2 \times 2 \times 1$  in all DFT calculations in **Sections 3, 4, and 5**.

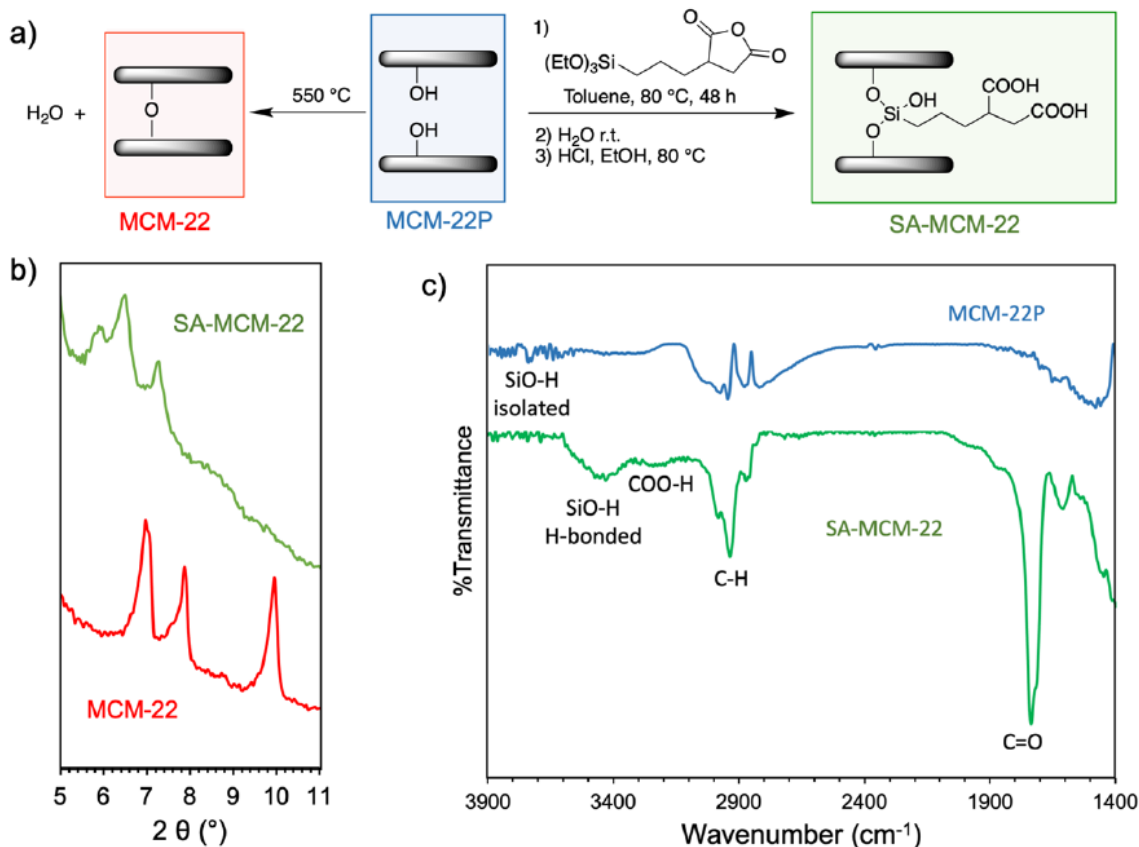

**Fig. S4.** (a) Synthesis of MCM-22 (red, left) and pillared SA-MCM-22 (green, right) from MCM-22P (blue, middle) by calcination and reaction with succinic acid triethoxysilane, respectively. (b) XRD patterns of the products show a shift of the low index planes in the pillared SA-MCM-22 to smaller angles than the calcined MCM-22 indicating larger  $d$ -spacing. (c) FTIR spectrum of the SA-MCM-22 confirms the presence of the pillaring group in the final compound.

#### ESI6. Synthesis and XRD and FTIR analysis of pillared MCM-22

In **Fig. S4a**, we provide a schematic for the conversion on MCM-22P either to MCM-22 by calcination, or to AP-MCM-22 by pillaring. XRD data comparing MCM-22 and AP-MCM-22 is shown in **Fig. S4b**. Analysis via Fourier transform infrared (FTIR) spectroscopy (**Fig. S4c**) confirms the presence of the pillaring agent in the resulting material. Intense carbonyl peaks are observed at  $1737 \text{ cm}^{-1}$  along with C–H stretching bands from  $2850 \text{ cm}^{-1}$  to  $2980 \text{ cm}^{-1}$ . All these bands are absent in the precursor MCM-22P. Isolated silanols in the precursor were at  $3731 \text{ cm}^{-1}$  and no longer exist in the product. Additional features in the pillared SA-MCM-22 product include H-bonding silanols indicated by the broad band



centered at ca.  $3430\text{ cm}^{-1}$  and a smaller broad band assigned to the carboxylic acid groups centered at ca.  $3210\text{ cm}^{-1}$ .

### ESI7. Analysis of interlayer spacings in MCM-22 and AP-MCM-22 from STEM

First, we briefly discuss specimen preparation for scanning transmission electron microscopy (STEM) imaging and image analysis. Roughly, 2 mL of dilute aqueous suspension containing as received MCM-22 and pillared MCM-22 type specimen, respectively, were placed on hydrophilized Quantifoil® (QF) holey carbon copper-supported grids and allowed to dry at room temperature. QF grids prepared in this manner were stored overnight in a desiccator before imaging. Imaging of interlayer spacings of zeolitic MCM-22 type materials was performed by using an aberration-corrected Thermo Scientific Titan Themis Cubed operating at 200 kV and hosted in the Sensitive Instrument Facility of Ames National Laboratory. Image processing was carried out using offline Gatan Microscopy Suite® software (GMS, Gatan Microscopy Suite® (GMS) software version 3.22.1461.0 - <http://www.gatan.com/installation-instructions>).

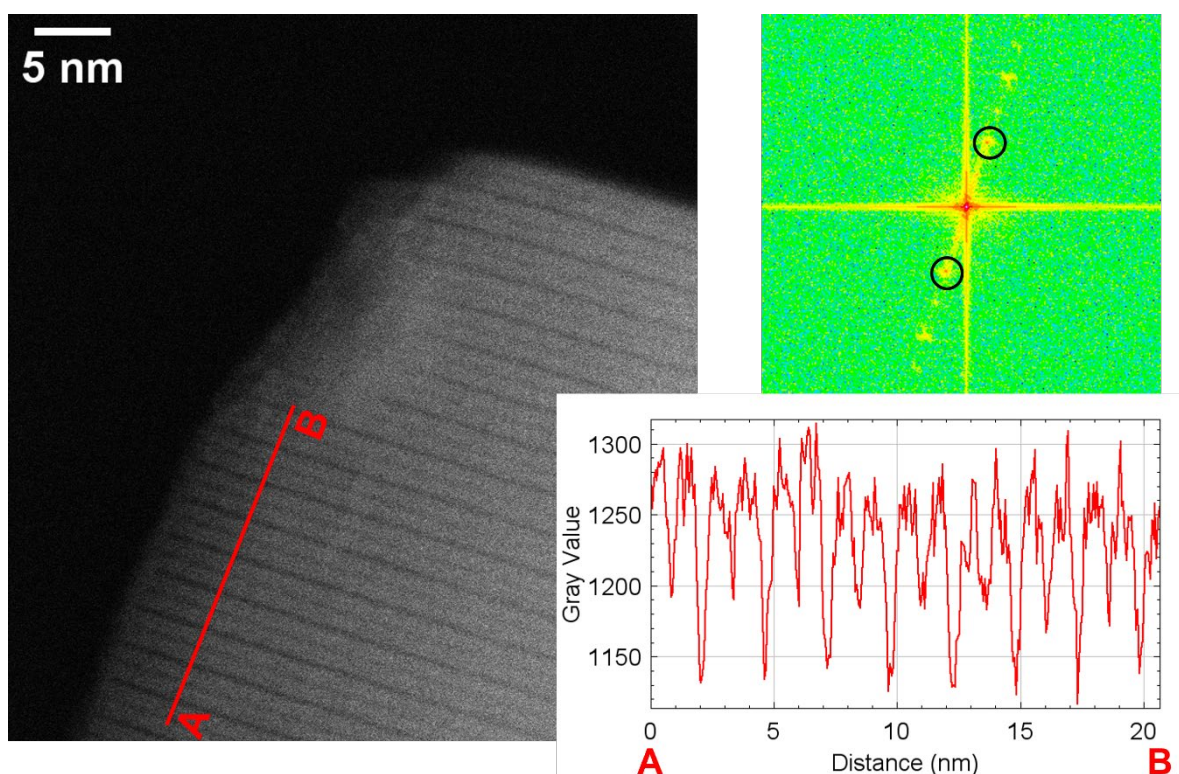

**Fig. S5.** MCM-22 sample of with Si:Al = 51:1. Left: A STEM image. Upper right: fast Fourier transform of the images where the spots associated with interlayer periodicity. Lower right: grayscale line scans orthogonal to the layers.

In **Fig. S5**, we show a STEM image of an MCM-22 sample with Si:Al = 51:1, including a grayscale line scan orthogonal to the layers. The darkest lines in the image are the grayscale minima, and are quite sharp, allowing direct estimate of the spacing between individual adjacent layers or periodicity. From the STEM image in **Fig. S5**, we obtain the

spacing values of about 25.8, 25.3, 24.7, 26.4, 27.7, 23.1, and 25.3 Å, quite narrowly distributed by about an average of 24.7 Å.

The STEM image becomes much noisier after exposure to the pillaring agent (succinic anhydride), as shown in **Fig. S6**. Nevertheless, the grayscale minima are still reasonably well resolved, and lead to the interlayer spacing estimates of about 33.0, 26.2, 33.0, and 27.2 Å with a significantly higher average and much broader distribution than **Fig. S5**.

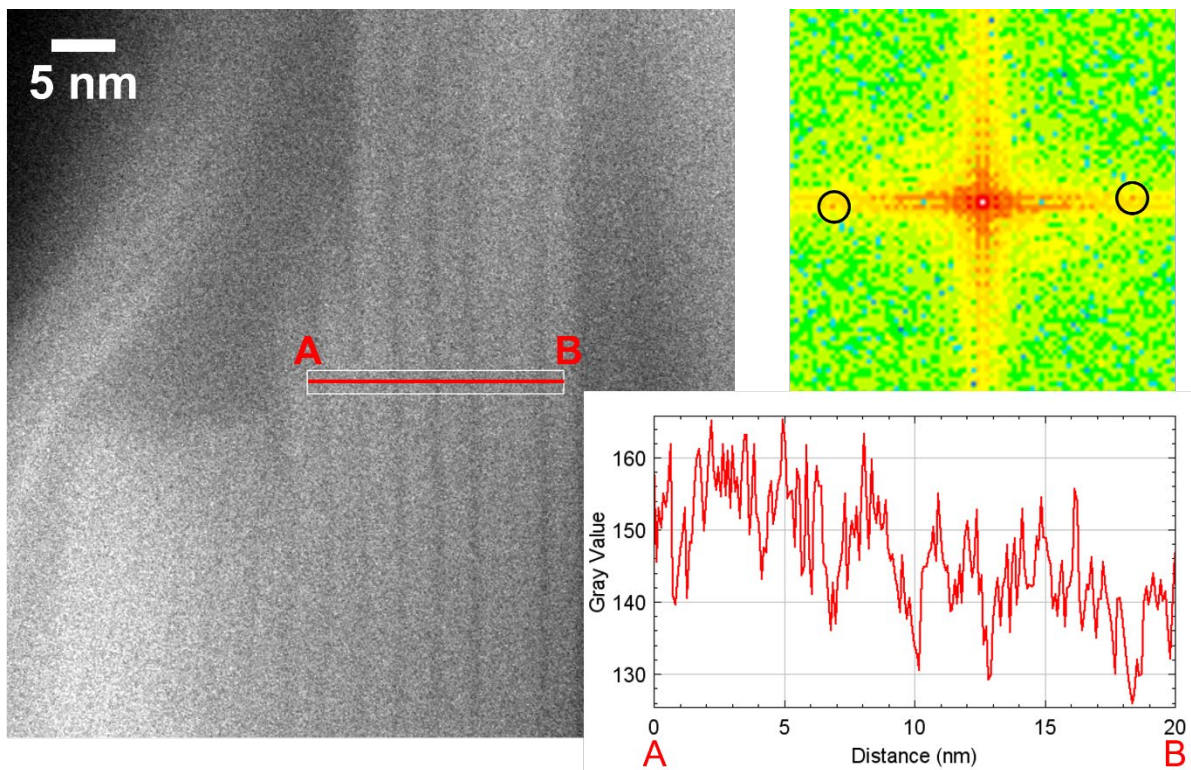

**Fig. S6.** SA-MCM-22 sample of with Si:Al = 51:1 after exposure to the pillaring agent, succinic anhydride. Left: A STEM image. Upper right: fast Fourier transform of the images where the spots associated with interlayer periodicity. Lower right: grayscale line scans orthogonal to the layers.

### ESI8. MD simulation parameters with empirical ReaxFF

In **Section 4**, MD simulations with an empirical ReaxFF [45, 46] using QuantumATK software [44] are utilized, prior to the final first principles DFT optimization for a given configuration. Based on the information from our preliminary studies, we always choose the NVT ensemble and the Nosé–Hoover thermostat for the MD procedure by implementing two simulation steps: first quenching and then annealing [58]. For the quenching, we set the temperature from 400 K to 300 K with a cooling rate of  $-5$  K/ps and a simulation time of 20 ps. For the annealing, we set a temperature of 300 K and simulation time of 40 ps. The time step is always set to be 0.5 fs.

## ESI9. Characterization of different classes of H-bonding

**Table S5.** Geometric and energetic parameters of the three basic types of H-bonds based on the Jeffrey's classification as suggested by Steiner [47].  $s_{H\cdots A}$ ,  $s_{X-H}$ , and  $s_{XA}$  are the corresponding atomic spacings between H and A, between X and H, and between X and A.  $\phi_{X-H\cdots A}$  is the bond angle. A negative bond energy indicates the attraction, and its magnitude indicates the interaction strength.

|                                  | Type S                          | Type M                    | Type W                      |
|----------------------------------|---------------------------------|---------------------------|-----------------------------|
| Interaction strength             | Strong (S)                      | Moderate (M)              | Weak (W)                    |
| Feature                          | covalent-like                   | electrostatic             | vdW-like                    |
| $s_{H\cdots A}$                  | 1.2 to 1.5 Å                    | 1.5 to 2.2 Å              | > 2.2 Å                     |
| $s_{X-H}$ versus $s_{H\cdots A}$ | $s_{X-H} \approx s_{H\cdots A}$ | $s_{X-H} < s_{H\cdots A}$ | $s_{X-H} \ll s_{H\cdots A}$ |
| $s_{XA}$                         | 2.2 to 2.5 Å                    | 2.5 to 3.2 Å              | > 3.2 Å                     |
| $\phi_{X-H\cdots A}$             | 170° to 180°                    | 130° to 180°              | 90° to 180°                 |
| Bond energy                      | -1.73 to -0.65 eV               | -0.65 to -0.17 eV         | > -0.17 eV                  |

## ESI10. Atomic spacings between H atoms and their surrounding atoms

To find the H-bonds as well as compare with the geometry of trimethylsilanol molecule, in **Table S6** we list all atomic spacings,  $s$ , between H atoms and their surrounding atoms in various configurations. Relative to the geometric parameters of a trimethylsilanol molecule, the  $s$  values of other configurations have no noticeable changes, e.g., any covalent O-H bond length in a hydroxyl group OH is about 0.97 Å, any covalent C-H bond length in a methyl group CH<sub>3</sub> is about 1.10 Å, any H-Si distance in a SiOH group are about 2.30 Å, and any H-H distance in a methyl group CH<sub>3</sub> is about 1.78 Å, as listed in **Table S6**. Also, any H-H distance in a pair of (upper and lower) hydroxyl groups of the precursor configuration (**Fig. 1d**) is about 2.14 Å, while the H-H distance in a pair of (upper and lower) hydroxyl groups of the 50% -OH + 50% (-O<sub>2</sub>)SiOHCH<sub>3</sub> configuration (**Fig. 4c**) is about 2.03 Å (see **Table S6**).

As revealed by **Fig. 5c**, the acceptor O7 in the H-bond O155-H247...O7 is an O atom of a Si-O-Si bridge at the upper layer surface, while the donor O155-H247 is a hydroxyl group OH in O<sub>I</sub>Si(OH)<sub>2</sub>CH<sub>3</sub> connecting the lower layer. Thus, O155-H247...O7 binds the upper and lower layers. Similarly, the acceptor O10 in the H-bond O154-H254...O10 is an O atom of a Si-O-Si bridge at the lower layer surface, while the donor O154-H254 is a hydroxyl group OH in O<sub>IV</sub>Si(OH)<sub>2</sub>CH<sub>3</sub> connecting the upper layer. Thus, O154-H254...O10 also binds the upper and lower layers. The significantly stronger H-bonding between the upper and lower layers facilitates shrinkage of the interlayer space, relative to the significantly weaker bonding only from vdW or vdW-like interactions.

**Table S6.** Atomic spacings  $s$  between H atoms and their surrounding atoms from our optB88-vdW calculations. Only the atomic spacings less than 2.3 Å are listed. The four atomic spacings with bold fonts indicate the H-bonds in **Fig. 5c**.

| Precursor <sup>a</sup> | $s$ (Å) | 50% A1 <sup>b</sup>  | $s$ (Å) | 100% A1 <sup>c</sup> | $s$ (Å) | 100% A2 <sup>d</sup> | $s$ (Å)      | TMS <sup>e</sup> | $s$ (Å) |
|------------------------|---------|----------------------|---------|----------------------|---------|----------------------|--------------|------------------|---------|
| H219-O2                | 2.278   | H225-O148            | 0.969   | H228-O149            | 0.969   | <b>H247-O7</b>       | <b>1.953</b> | H15-O4           | 0.968   |
| H219-O146              | 0.971   | H226-O3              | 2.167   | H232-O150            | 0.969   | H247-O155            | 0.976        |                  |         |
| H220-O2                | 0.971   | H226-O147            | 0.972   |                      |         | <b>H248-O151</b>     | <b>1.784</b> |                  |         |
| H220-O146              | 2.267   | H227-O3              | 0.972   |                      |         | H248-O156            | 0.986        |                  |         |
| H221-O1                | 2.288   | H227-O147            | 2.125   |                      |         | H249-O157            | 0.971        |                  |         |
| H221-O145              | 0.971   |                      |         |                      |         | H250-O158            | 0.973        |                  |         |
| H222-O1                | 0.971   |                      |         |                      |         | H251-O151            | 0.973        |                  |         |
| H222-O145              | 2.259   |                      |         |                      |         | H252-O152            | 0.971        |                  |         |
|                        |         |                      |         |                      |         | H253-O153            | 0.986        |                  |         |
|                        |         |                      |         |                      |         | <b>H253-O158</b>     | <b>1.784</b> |                  |         |
|                        |         |                      |         |                      |         | <b>H254-O10</b>      | <b>1.952</b> |                  |         |
|                        |         |                      |         |                      |         | H254-O154            | 0.976        |                  |         |
|                        |         | H222-C1 <sup>f</sup> | 1.098   | H225-C1              | 1.097   | H235-C1              | 1.099        | H6-C1            | 1.098   |
|                        |         | H223-C1              | 1.098   | H226-C1              | 1.098   | H236-C2              | 1.098        | H7-C1            | 1.099   |
|                        |         | H224-C1              | 1.097   | H227-C1              | 1.097   | H237-C3              | 1.098        | H8-C1            | 1.099   |
|                        |         |                      |         | H229-C2              | 1.098   | H238-C4              | 1.100        | H9-C2            | 1.098   |
|                        |         |                      |         | H230-C2              | 1.098   | H239-C1              | 1.096        | H10-C2           | 1.098   |
|                        |         |                      |         | H231-C2              | 1.099   | H240-C2              | 1.099        | H11-C2           | 1.098   |
|                        |         |                      |         |                      |         | H241-C3              | 1.099        | H12-C3           | 1.098   |
|                        |         |                      |         |                      |         | H242-C4              | 1.099        | H13-C3           | 1.099   |
|                        |         |                      |         |                      |         | H243-C1              | 1.100        | H14-C3           | 1.099   |
|                        |         |                      |         |                      |         | H244-C2              | 1.096        |                  |         |
|                        |         |                      |         |                      |         | H245-C3              | 1.096        |                  |         |
|                        |         |                      |         |                      |         | H246-C4              | 1.096        |                  |         |
| H219-Si148             | 2.280   | H225-Si221           | 2.289   | H228-Si223           | 2.292   | H249-Si233           | 2.293        | H15-Si5          | 2.299   |
| H220-Si149             | 2.281   | H226-Si150           | 2.275   | H232-Si224           | 2.287   | H252-Si232           | 2.293        |                  |         |
| H221-Si150             | 2.278   | H227-Si151           | 2.282   |                      |         |                      |              |                  |         |
| H222-Si147             | 2.284   |                      |         |                      |         |                      |              |                  |         |
| H219-H220              | 2.139   | H222-H223            | 1.779   | H225-H226            | 1.779   | H235-H239            | 1.778        | H6-H7            | 1.775   |
| H221-H222              | 2.143   | H222-H224            | 1.779   | H225-H227            | 1.779   | H235-H243            | 1.784        | H6-H8            | 1.774   |
|                        |         | H223-H224            | 1.778   | H226-H227            | 1.779   | H236-H240            | 1.780        | H7-H8            | 1.771   |
|                        |         | H226-H227            | 2.029   | H229-H230            | 1.780   | H236-H244            | 1.778        | H9-H10           | 1.776   |
|                        |         |                      |         | H229-H231            | 1.776   | H237-H241            | 1.780        | H9-H11           | 1.776   |
|                        |         |                      |         | H230-H231            | 1.780   | H237-H245            | 1.778        | H10-H11          | 1.774   |
|                        |         |                      |         |                      |         | H238-H242            | 1.784        | H12-H13          | 1.775   |
|                        |         |                      |         |                      |         | H238-H246            | 1.781        | H12-H14          | 1.775   |
|                        |         |                      |         |                      |         | H239-H243            | 1.781        | H13-H14          | 1.771   |
|                        |         |                      |         |                      |         | H240-H244            | 1.781        |                  |         |
|                        |         |                      |         |                      |         | H241-H245            | 1.781        |                  |         |
|                        |         |                      |         |                      |         | H242-H246            | 1.778        |                  |         |

<sup>a</sup> "Precursor" denotes the "100% OH" supercell with 222 atoms (**Fig. 1d**).

<sup>b</sup> "50% A1" denotes the "50% OH + 50% (-O<sub>2</sub>)SiOHCH<sub>3</sub>" supercell with 227 atoms (**Fig. 4c**).

<sup>c</sup> "100% A1" denotes the "0% OH + 100% (-O<sub>2</sub>)SiOHCH<sub>3</sub>" supercell with 232 atoms (**Fig. 4d**).

<sup>d</sup> "100% A2" denotes the "0% OH + 100% (-O)Si(OH)<sub>2</sub>CH<sub>3</sub>" supercell with 254 atoms (**Fig. 5b** or **5c**).

<sup>e</sup> "TMS" denotes a trimethylsilanol molecule with 15 atoms (left of **Fig. 4a** or **5a**).

<sup>f</sup> As an example, "H222-C1" in the third column denotes the atomic spacing between the H atom with ID number 222 (i.e., the 222th atom H) and the C atom with ID number 1 (i.e., the 1st atom C) in the "50% OH + 50% (-O<sub>2</sub>)SiOHCH<sub>3</sub>" supercell (**Fig. 4c**) with 227 atoms corresponding to 227 ID numbers. The analogous statement applies to each of other atomic pairs in this table.

Let us also examine two rest H-bonds. From **Fig. 5c**, H248 in O156–H248...O151 is a H atom of a hydroxyl group OH in O<sub>n</sub>Si(OH)<sub>2</sub>CH<sub>3</sub>, while the donor atom O156 and the

acceptor atom O151 are from the hydroxyl groups in  $O_{11}Si(OH)_2CH_3$  and  $O_1Si(OH)_2CH_3$ , respectively. Both  $O_{11}Si(OH)_2CH_3$  and  $O_1Si(OH)_2CH_3$  only connect the lower layer. Then, the H-bond of  $O156-H248\cdots O151$  does not contribute to the interlayer spacing reduction. From the similar analysis, neither does the H-bond of  $O153-H253\cdots O158$ .

### ESI11. Relative thermodynamic stability of pillared versus grafted configurations

To assess the relative thermodynamic stability of pillared versus grafted materials based on DFT analysis of energies, one can start with the same “reactant” system on the left, as illustrated in **Fig. S7**. Then, one just compares the energies of the two distinct pillared versus grafted “product” systems on right. In evaluating the energy difference of two “product” systems, note that the 8 RH cancel out, so that the result does not depend on the choice of R or the corresponding energy  $E_{RH}$ . In our DFT analysis,  $R = CH_3$ . The energy difference between pillared and grafted configurations can be calculated as

$$\Delta E = E(\text{grafted system}) - E(\text{pillared system}) = E_{\text{graft}} + E_{\text{precursor}} - 2E_{\text{pillar}} - 4E_{H_2O},$$

where  $E_{H_2O}$  is the energy of an isolated  $H_2O$  molecule;  $E_{\text{precursor}}$ ,  $E_{\text{pillar}}$ , and  $E_{\text{graft}}$  are the energies of precursor, pillared, and grafted unit cells, respectively. Using the values of these energies from our DFT calculations, we obtain  $\Delta E = -1.013$  eV, indicating that the grafted configuration is thermodynamically favored.

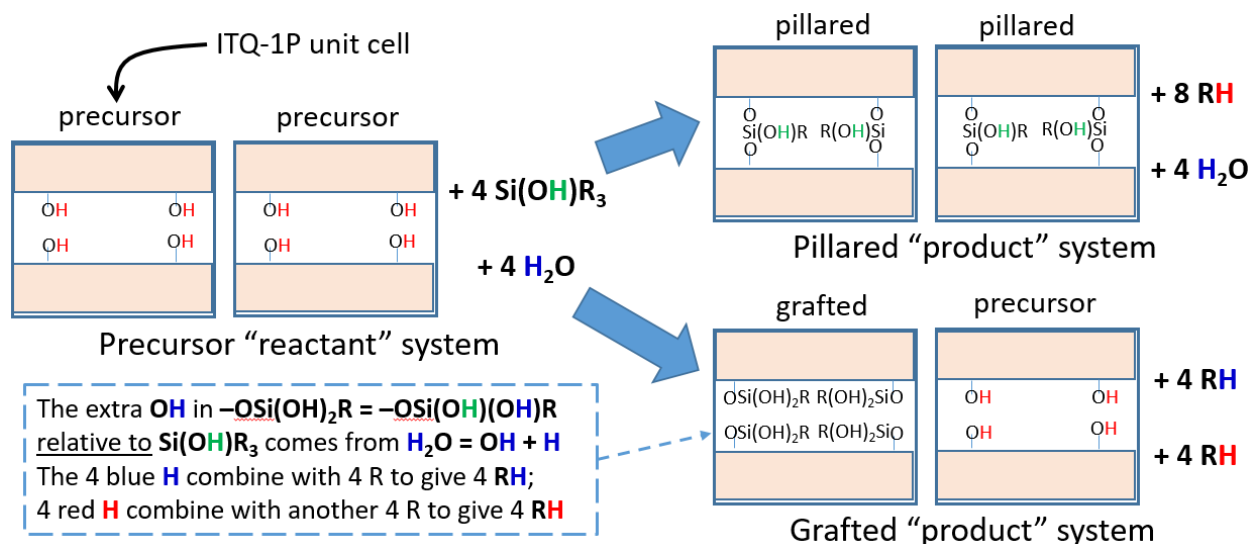

**Fig. S7.** Illustration for computational setup for determination of the relative thermodynamic preference of pillared versus grafted configurations.

## References

For Refs. [1–48], see the main text.

- [49] F. D. Stacey, B. J. Brennan and R. D. Irvine, *Geophys. Surveys*, 1981, **4**, 189–232.
- [50] P. Vinet, J. R. Smith, J. Ferrante and J. H. Rose, *Phys. Rev. B*, 1987, **35**, 1945–1953.
- [51] Y. Jiang, Y. Shi, X. Xiang, J. Qi, Y. Han, Z. Liao and T. Lu, *Phys. Rev. Appl.*, 2019, **11**, 054088.
- [52] L. Levien, C. T. Prewitt and D. J. Weidner, *Am. Miner.*, 1980, **65**, 920–930.
- [53] G. A. Lager, J. D. Jorgensen and F. J. Rotella, *J. Appl. Phys.*, 1982, **53**, 6751–6756.
- [54] R. M. Hazen, L. W. Finger, R. J. Hemley and H. K. Mao, *Solid State Commun.*, 1989, **72**, 507–511.
- [55] H. J. McSkimin, P. Andreatch and R. N. Thurston, *J. Appl. Phys.*, 1965, **36**, 1624–1632.
- [56] G. Hautier, S. P. Ong, A. Jain, C. J. Moore and G. Ceder, *Phys. Rev. B*, 2012, **85**, 155208.
- [57] V. V. Narkhede and H. Gies, *Chem. Mater.*, 2009, **21**, 4339–4346.
- [58] Y. Han, I. I. Slowing and J. W. Evans, *J. Chem. Phys.*, 2020, **153**, 124708.
